# Supplementary material for: Gene Expression Signatures of BRCAness and Tumor Inflammation Define Subgroups of Early-Stage Hormone Receptor–Positive Breast Cancer Patients
Source: Oxford University Press journal article supplement (doi:10.1158/1078-0432.ccr-20-1923), 2020-10-02
Supplement: 10780432ccr201923-sup-243665_2_supp_6603422_qh7pzs.xlsx [file 10780432ccr201923-sup-243665_2_supp_6603422_qh7pzs.xlsx]

## Sheet: Supplementary Table S1
Supplementary Table S1. Patient and tumor characteristics of the BreastMark verification cohort
	Patients retrieved from BreastMark database: N=1936
Filter 1	ER-positive, postmenopausal, available gene expression data, available PAM50 subtype assignment: N=613
Filter 2	ER-positive, postmenopausal, available gene expression data, available PAM50 subtype assignment and clinical follow-up: N=504
	Follow-up (years)	Median	6.5
		Range	0.1-18.1
	Age at diagnosis (years)	Median	63
		Range	51-88
	Characteristic	N	%
	Tumor size (cm)
	≤ 2	159	31.5
	2 - 5	192	38.1
	> 5	10	2
	Unknown	143	28.4
	Nodal status
	Negative	209	41.5
	Positive	239	47.4
	Unknown	56	11.1
	Grading
	G1	90	17.9
	G2	236	46.8
	G3	121	24
	Unknown	57	11.3
	Hormone receptor status
	ER-Positive	504	100
	ER-Negative	0	0
	PR-Positive	274	54.4
	PR-Negative	74	14.7
	PR unknown	156	31
	HER2 status
	Positive	29	5.8
	Negative	288	57.1
	Unknown	187	37.1
	PAM50 subtype
	Luminal A	205	40.7
	Luminal B	262	52
	HER2	23	4.6
	Basal	14	2.8
	Chemotherapy	NA*
	Endocrine therapy	NA*
	*data not fully available

## Sheet: Supplementary Table S2
Supplementary Table S2. List of genes included in the BC360 Nanostring transcriptomic array
BC360 Panel Genes	Class: HK=housekeeping gene; T=target gene
ABCF1	HK
ACTB	HK
G6PD	HK
GUSB	HK
MRPL19	HK
NRDE2	HK
OAZ1	HK
POLR2A	HK
PSMC4	HK
PUM1	HK
RPLP0	HK
SDHA	HK
SF3A1	HK
STK11IP	HK
TBC1D10B	HK
TBP	HK
TFRC	HK
UBB	HK
ABCA8	T
ACTR3B	T
ACVR1B	T
ACVR1C	T
ACVRL1	T
ADAM12	T
ADCY9	T
ADD1	T
ADM	T
AGR2	T
AGT	T
AGTR1	T
AKT3	T
ALDH1A1	T
ALDOA	T
ANGPT1	T
ANLN	T
ANXA9	T
APH1B	T
APOD	T
APOE	T
AR	T
AREG	T
ARID1A	T
ARNT2	T
ASPM	T
ASPN	T
ATAD2	T
ATM	T
ATP10B	T
AURKA	T
AURKB	T
AXIN1	T
AXIN2	T
B3GNT3	T
BAD	T
BAG1	T
BAI1	T
BAIAP3	T
BAMBI	T
BAX	T
BBC3	T
BBOX1	T
BCAS1	T
BCL11A	T
BCL2	T
BCL2A1	T
BCL2L1	T
BCL6B	T
BDNF	T
BIRC5	T
BLM	T
BLVRA	T
BMP2	T
BMP4	T
BMP5	T
BMP6	T
BMP7	T
BMP8A	T
BMPR1A	T
BMPR1B	T
BMPR2	T
BNC2	T
BNIP3	T
BRCA1	T
BRCA2	T
BTG2	T
C10orf32	T
C13orf3	T
C20orf82	T
C5orf38	T
CA12	T
CACNA1D	T
CACNA1H	T
CACNA2D1	T
CACNA2D3	T
CACNG1	T
CACNG4	T
CACNG6	T
CALML5	T
CAMK2B	T
CAV1	T
CBLC	T
CCL2	T
CCL21	T
CCL3/L1	T
CCL4	T
CCL5	T
CCL7	T
CCL8	T
CCNA1	T
CCNA2	T
CCNB1	T
CCND1	T
CCND2	T
CCNE1	T
CCNE2	T
CCR1	T
CCR2	T
CCR5	T
CD10	T
CD163	T
CD19	T
CD1E	T
CD24	T
CD27	T
CD274	T
CD276	T
CD29	T
CD34	T
CD36	T
CD44	T
CD49f	T
CD68	T
CD84	T
CD8A	T
CD8B	T
CDC14A	T
CDC14B	T
CDC20	T
CDC25A	T
CDC25B	T
CDC25C	T
CDC6	T
CDC7	T
CDCA1	T
CDCA5	T
CDCA7L	T
CDCA8	T
CDH1	T
CDH2	T
CDH3	T
CDH5	T
CDK1	T
CDK6	T
CDKN1A	T
CDKN1B	T
CDKN1C	T
CDKN2A	T
CDKN2B	T
CDKN2C	T
CDKN2D	T
CDKN3	T
CEACAM5	T
CEACAM6	T
CENPF	T
CEP55	T
CFD	T
CHAD	T
CHEK2	T
CHI3L1	T
CHIT1	T
CHRNA5	T
CKB	T
CKMT1A	T
CKS1B	T
CLDN1	T
CLDN3	T
CLDN4	T
CLDN7	T
CLEC14A	T
CLEC5A	T
CMKLR1	T
CNTFR	T
COL11A1	T
COL27A1	T
COL2A1	T
COL4A6	T
COL6A3	T
COL7A1	T
COL9A3	T
COLEC12	T
COMP	T
CPA3	T
CREBBP	T
CRYAB	T
CSF3R	T
CTSW	T
CXADR	T
CXCL10	T
CXCL12	T
CXCL13	T
CXCL5	T
CXCL9	T
CXCR6	T
CXorf36	T
CXXC5	T
CYBB	T
CYP4F3	T
DCN	T
DDB2	T
DDR2	T
DDX39	T
DEPDC1	T
DHRS2	T
DKK1	T
DKK2	T
DLG7	T
DLL1	T
DLL3	T
DLL4	T
DNAJC12	T
DPT	T
DSC2	T
DTX1	T
DTX3	T
DTX4	T
DUSP4	T
DUSP6	T
E2F1	T
E2F5	T
ECM2	T
EDN1	T
EDNRB	T
EFNA3	T
EFNA5	T
EGF	T
EGFR	T
EGLN2	T
EGLN3	T
EIF2AK3	T
EIF3B	T
EIF4E2	T
EIF4EBP1	T
ELF3	T
ELK3	T
ELOVL2	T
EMCN	T
ENO1	T
ENPP2	T
EP300	T
EPAS1	T
ERBB2	T
ERBB4	T
EREG	T
ESPL1	T
ESR1	T
ETV4	T
ETV7	T
EXO1	T
EYA1	T
EYA2	T
EYA4	T
F3	T
FAM124B	T
FAM198B	T
FAM214A	T
FAM83D	T
FANCF	T
FAP	T
FBN1	T
FGF1	T
FGF10	T
FGF12	T
FGF13	T
FGF18	T
FGF2	T
FGF7	T
FGF9	T
FGFR2	T
FGFR3	T
FGFR4	T
FGL2	T
FHL1	T
FIGF	T
FLI1	T
FLNC	T
FLRT3	T
FLT3	T
FNBP1	T
FOS	T
FOSL1	T
FOXA1	T
FOXC1	T
FOXC2	T
FOXM1	T
FOXP3	T
FREM2	T
FST	T
FSTL1	T
FSTL3	T
FUT3	T
FXYD3	T
FZD10	T
FZD7	T
FZD8	T
FZD9	T
GABRP	T
GADD45A	T
GADD45B	T
GADD45G	T
GAS1	T
GATA3	T
GATA4	T
GDF15	T
GDF5	T
GGH	T
GHR	T
GJB2	T
GLI3	T
GNG4	T
GNLY	T
GPC4	T
GPR160	T
GPX3	T
GRB2	T
GRB7	T
GREM1	T
GRIA3	T
GRIN1	T
GRIN2A	T
GSK3B	T
GTF2H2	T
GZMA	T
GZMB	T
GZMH	T
GZMM	T
HAPLN1	T
HAS1	T
HBB	T
HDAC1	T
HDAC10	T
HDAC11	T
HDAC2	T
HDAC5	T
HDAC6	T
HDC	T
HEG1	T
HELLS	T
HEMK1	T
HES1	T
HGF	T
HIF1A	T
HIST1H1C	T
HIST1H2BH	T
HIST1H3H	T
HIST3H2BB	T
HK2	T
HLA.A	T
HLA.B	T
HLA.C	T
HLA.DMA	T
HLA.DMB	T
HLA.DOB	T
HLA.DPA1	T
HLA.DPB1	T
HLA.DQA1	T
HLA.DQB1	T
HLA.DRA	T
HLA.DRB1	T
HLA.E	T
HMGA1	T
HNF1A	T
HOXA5	T
HOXA7	T
HOXA9	T
HOXB13	T
HOXB3	T
HSPA2	T
IBSP	T
ICAM1	T
ID1	T
ID2	T
ID4	T
IDO1	T
IFT140	T
IGF1	T
IGF1R	T
IKZF3	T
IL10RA	T
IL11RA	T
IL12RB2	T
IL13RA1	T
IL1B	T
IL1R2	T
IL1RN	T
IL20RA	T
IL20RB	T
IL22RA2	T
IL24	T
IL2RA	T
IL2RB	T
IL3RA	T
IL4R	T
IL6	T
IL6R	T
IL7R	T
IL8	T
INHBA	T
INHBB	T
IRF6	T
IRX1	T
ISG15	T
ITGAV	T
ITGB3	T
ITGB6	T
ITPR1	T
JAG1	T
JAG2	T
JAK1	T
JAK2	T
JAK3	T
JAM2	T
JUN	T
KAT2B	T
KCNB1	T
KDR	T
KIAA0040	T
KIAA1462	T
KIF11	T
KIF14	T
KIF23	T
KIF2C	T
KIFC1	T
KIT	T
KLRK1	T
KNTC2	T
KRT14	T
KRT17	T
KRT5	T
KRT6B	T
KRT7	T
LAD1	T
LAG3	T
LAMA3	T
LAMB3	T
LAMC2	T
LEF1	T
LEFTY2	T
LEMD1	T
LEP	T
LEPR	T
LFNG	T
LIF	T
LIFR	T
LOC400043	T
LPL	T
LRP2	T
LRRC32	T
LTB	T
LTBP1	T
MAD2L1	T
MAF	T
MAML2	T
MAP2K4	T
MAP3K12	T
MAPK1	T
MAPK10	T
MAPK3	T
MAPK8IP2	T
MAPT	T
MARCO	T
MCM2	T
MCM3	T
MDM2	T
MED1	T
MELK	T
MEOX2	T
MET	T
MFNG	T
MIA	T
MIS18A	T
MKI67	T
MLH1	T
MLLT3	T
MLPH	T
MMP11	T
MMP14	T
MMP3	T
MMP7	T
MMP9	T
MMRN2	T
MRE11	T
MS4A2	T
MSR1	T
MT1G	T
MTOR	T
MUC1	T
MUS81	T
MYBL2	T
MYC	T
MYCN	T
MYCT1	T
NASP	T
NAT1	T
NCAM1	T
NCAPH2	T
NDP	T
NEIL1	T
NEIL3	T
NEO1	T
NETO2	T
NFATC1	T
NFKBIZ	T
NGFR	T
NKG7	T
NOD2	T
NOTCH1	T
NOTCH2	T
NOTCH3	T
NPEPPS	T
NPR1	T
NR4A1	T
NR4A3	T
NRCAM	T
NRXN1	T
NRXN3	T
NSD1	T
NTRK2	T
NUDT1	T
NUMBL	T
NUPR1	T
OAS3	T
OCLN	T
OGN	T
OLFML2B	T
ORC6L	T
PALB2	T
PALMD	T
PARP1	T
PARP2	T
PARP4	T
PAX5	T
PAX8	T
PBX3	T
PCK1	T
PCNA	T
PDCD1LG2	T
PDE9A	T
PDGFB	T
PDGFRA	T
PDGFRB	T
PDK4	T
PECAM1	T
PFDN2	T
PGK1	T
PGR	T
PHGDH	T
PIK3CA	T
PIK3CD	T
PIK3CG	T
PIK3R1	T
PIK3R2	T
PIK3R3	T
PIK3R5	T
PIM1	T
PIP	T
PKMYT1	T
PLA1A	T
PLA2G2A	T
PLA2G3	T
PLA2G4A	T
PLA2G4F	T
PLAT	T
PLCB1	T
PLCB4	T
PLCE1	T
PLD1	T
POLD1	T
POLQ	T
POPDC3	T
PPARG	T
PPARGC1A	T
PPP2CB	T
PPP2R1A	T
PPP2R2C	T
PRC1	T
PREP	T
PRF1	T
PRKAA2	T
PRKACA	T
PRKACB	T
PRKCA	T
PRKCB	T
PRKDC	T
PRKX	T
PRLR	T
PROM1	T
PSAT1	T
PSMB10	T
PSMB7	T
PSMB9	T
PTCH1	T
PTEN	T
PTGDS	T
PTGER3	T
PTGS2	T
PTTG1	T
PYCARD	T
RAC2	T
RAC3	T
RAD51	T
RAD51C	T
RAD52	T
RAD54L	T
RARRES3	T
RASAL1	T
RASGRF1	T
RASGRF2	T
RASGRP1	T
RB1	T
RBL1	T
RBL2	T
RBX1	T
RELN	T
RFC4	T
RNASE2	T
RNF103	T
ROBO4	T
ROCK1	T
ROCK2	T
RORA	T
RORB	T
RPS6KA5	T
RPS6KB1	T
RPS6KB2	T
RRM2	T
RUNX3	T
S100A14	T
S100A7	T
S1PR1	T
SCARA5	T
SCUBE2	T
SELE	T
SERBP1	T
SERPINB5	T
SERPINH1	T
SFN	T
SFRP1	T
SFRP2	T
SFRP4	T
SHC2	T
SHC4	T
SHE	T
SHMT2	T
SIDT1	T
SIGIRR	T
SIX1	T
SKP1	T
SKP2	T
SLC2A1	T
SLC39A6	T
SLC44A4	T
SLPI	T
SMAD1	T
SMAD3	T
SMAD4	T
SMAD5	T
SMC1B	T
SMO	T
SMURF2	T
SNAI1	T
SNAI2	T
SOCS1	T
SOCS2	T
SOCS3	T
SOX10	T
SOX17	T
SOX2	T
SOX9	T
SP1	T
SPC25	T
SPDEF	T
SPN	T
SPP1	T
SPRY1	T
SPRY2	T
SPRY4	T
SRPX	T
ST6GALNAC2	T
STAT1	T
STC1	T
SUV39H2	T
SYTL4	T
TAP1	T
TAP2	T
TAPBP	T
TBC1D9	T
TBX1	T
TCEAL1	T
TCF4	T
TCF7L1	T
TEK	T
TFDP1	T
TFF1	T
TFF3	T
TGFB1	T
TGFB2	T
TGFB3	T
TGFBR2	T
THBS1	T
THBS2	T
THBS4	T
THY1	T
TIE1	T
TIGIT	T
TIMP4	T
TLE3	T
TLR4	T
TLX1	T
TMEM45B	T
TMPRSS2	T
TMPRSS4	T
TNF	T
TNFAIP6	T
TNFSF10	T
TNKS	T
TNKS2	T
TNN	T
TOP2A	T
TP53	T
TPSAB1/B2	T
TRIP13	T
TSPAN1	T
TSPAN7	T
TTK	T
TTYH1	T
TUBA4A	T
TWIST1	T
TWIST2	T
TYK2	T
TYMP	T
TYMS	T
UBE2C	T
UBE2T	T
VCAN	T
VEGFA	T
VIM	T
VIT	T
WDR77	T
WEE1	T
WHSC1L1	T
WIF1	T
WNT10A	T
WNT11	T
WNT2	T
WNT4	T
WNT5A	T
WNT5B	T
WNT6	T
WNT7B	T
WRN	T
WT1	T
XRCC2	T
XRCC3	T
ZBTB16	T
ZEB1	T
ZEB2	T
ZFPM2	T
ZFYVE9	T
ZIC2	T
ZNF205	T

## Sheet: Supplementary Table S3
Supplementary Table S3. BC360 Signature genes
TIS genes	BRCAness genes
CCL5	ADM
CD27	ANLN
CD274	ASPM
CD276	ATP10B
CD8A	BBOX1
CMKLR1	BLM
CXCL9	BRCA1
CXCR6	BTG2
HLA-DQA1	SKA3
HLA-DRB1	ISM1
HLA-E	C5orf38
IDO1	CCNA2
LAG3	CCNB1
NKG7	CCNE1
PDCD1LG2	CD68
PSMB10	CDC7
STAT1	CDCA8
TIGIT	CDKN1C
	CHRNA5
	CRYAB
	CYP4F3
	DCN
	DDX39A
	DEPDC1
	EXO1
	FAM83D
	FLRT3
	FXYD3
	GJB2
	HIST1H1C
	HLA-E
	IL1R2
	KCNB1
	KIF14
	KRT6B
	LEMD1
	MCM2
	MCM3
	MME
	MT1G
	NEIL3
	NETO2
	PCNA
	PKMYT1
	POLD1
	POLQ
	RFC4
	RRM2
	SPC25
	ST6GALNAC2
	TRIP13
	TTK
	TYMS

## Sheet: Supplementary Table S4
Supplementary Table S4. Cox proportional hazard ratios of expression scores in higher-risk patients with and without chemotherapy
Subgroup	Predictor	HR	95% CI	P
HT-with chemo (N=109)	AR	2.8	1.2-6.4	0.0099
	BRCAness	5.9	1.7-20.1	0.0013
HT-without chemo (N=144)	AR	7.1	2.5-19.8	2e-05
	BRCAness	15.9	1.9-129	0.00049
HT = antihormone treatment; chemo = neo- or adjuvant chemotherapy
BRCAness: impaired BRCA function – low (reference) vs high; AR: androgen receptor expression - high (reference) vs low
